# Supplementary material for: A genome-wide association study of bitter and sweet beverage consumption
Source: Oxford University Press journal article supplement (doi:10.1093/hmg/ddz061), 2019-03-27
Supplement: suppl_tables_2-4_captions_and_legends_ddz061.docx [file suppl_tables_2-4_captions_and_legends_ddz061.docx]

Supplementary Table 2. BMI adjusted results for independent SNPs from stage 1 selected for replication in stage 2

Supplementary Table 3. BMI unadjusted results for independent SNPs from stage 1 selected for replication in stage 2

Supplementary Table 4, Results for bitter alcoholic beverages, coffee, and tea using diet data collected from 24-hour dietary recalls
